# Supplementary material
Source: PubMed Central journal article supplement (PMC8170529)

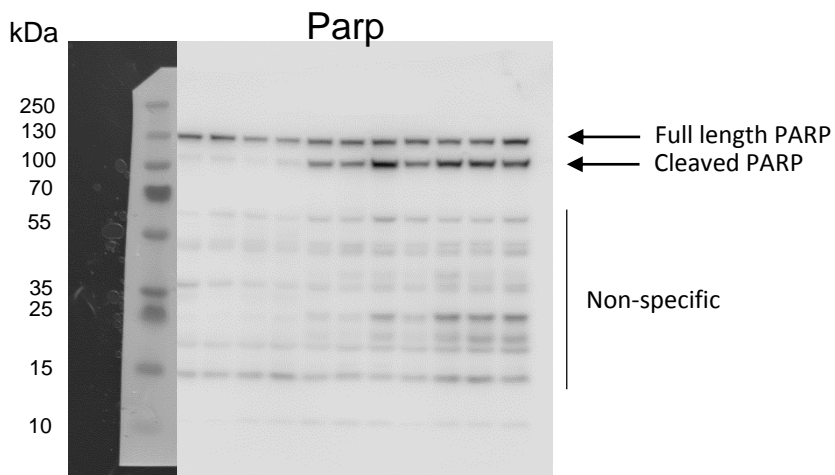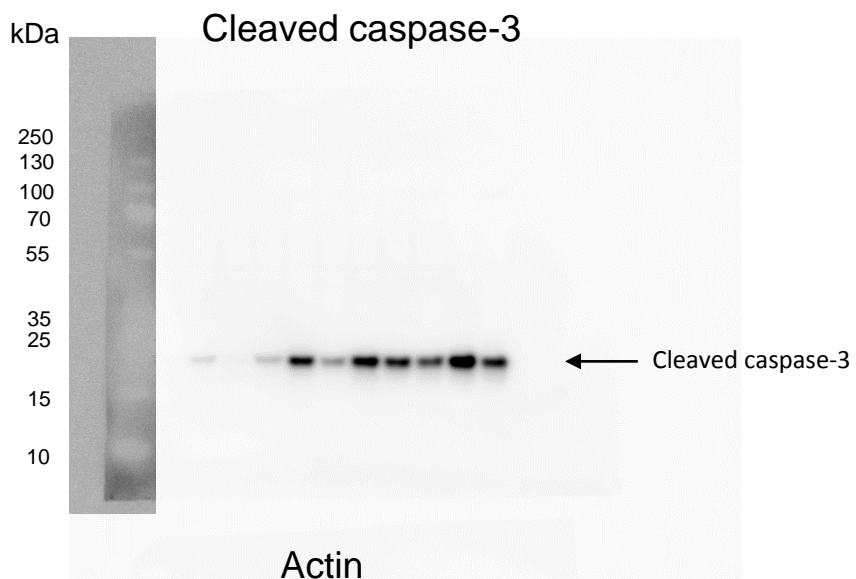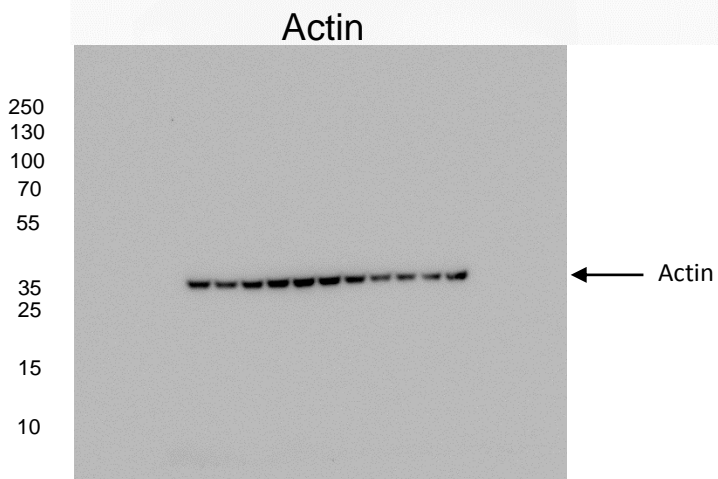

**Supplementary Figure 1. Source Data (Gels) from Extended Data Figure 5c.**

Supplement: NIHMS1703052-supplement-1703052_Supp_fig1.pdf [file NIHMS1703052-supplement-1703052_Supp_fig1.pdf]

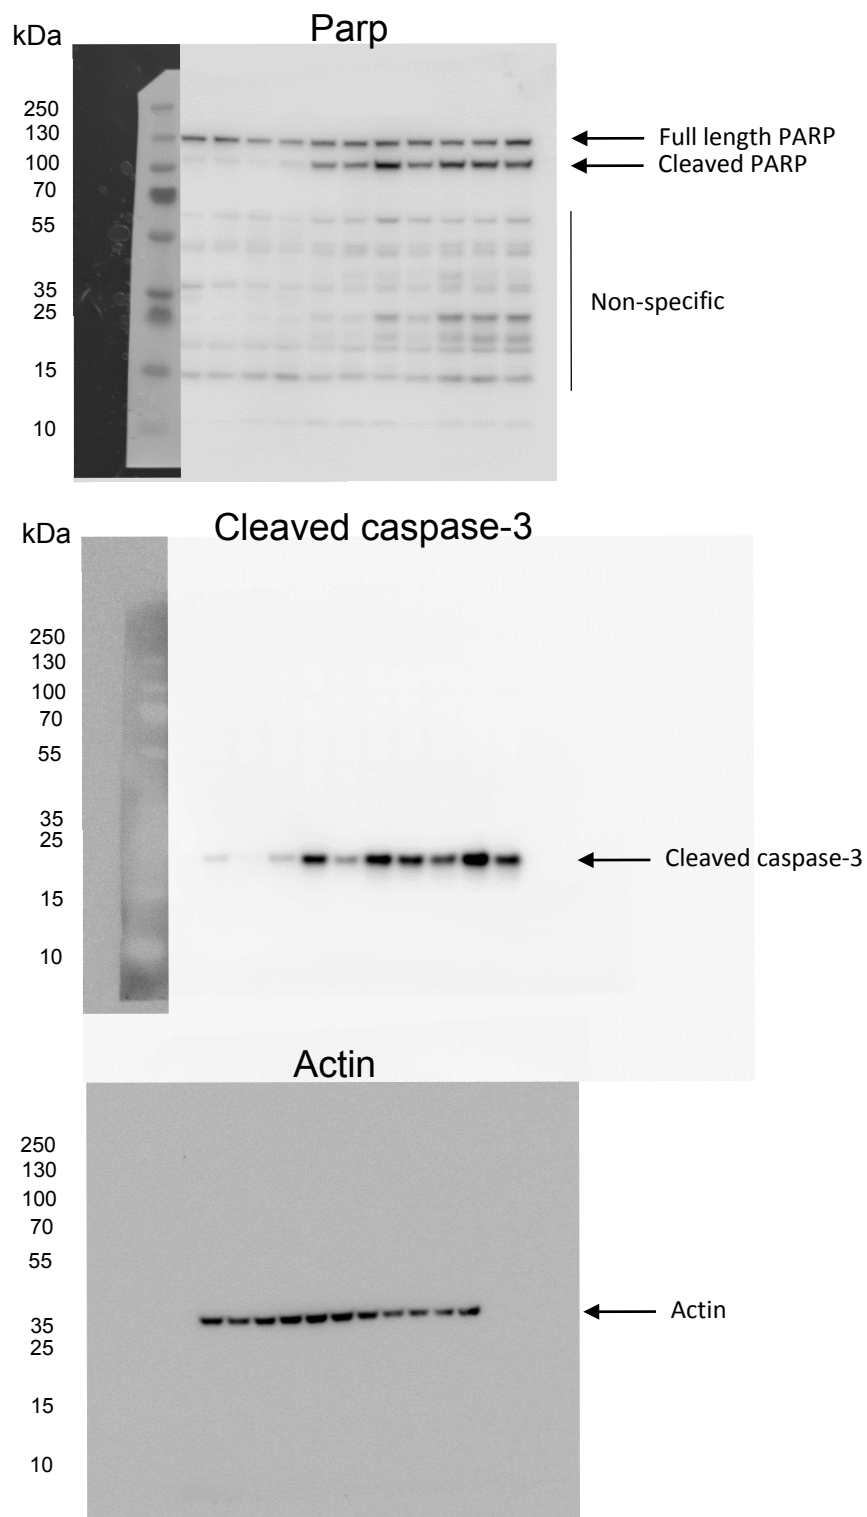

**Supplementary Figure 1. Source Data (Gels) from Extended Data Figure 5c.**

Supplement: NIHMS1703052-supplement-1703052_Supp_info.pdf [file NIHMS1703052-supplement-1703052_Supp_info.pdf]
